# Supplementary material
Source: PubMed Central journal article supplement (PMC2575447)
Supplement: 0806578105_0806578105SI.pdf [file 0806578105_0806578105SI.pdf]

# Supporting Information

Grueneberg *et al.* 10.1073/pnas.0806578105

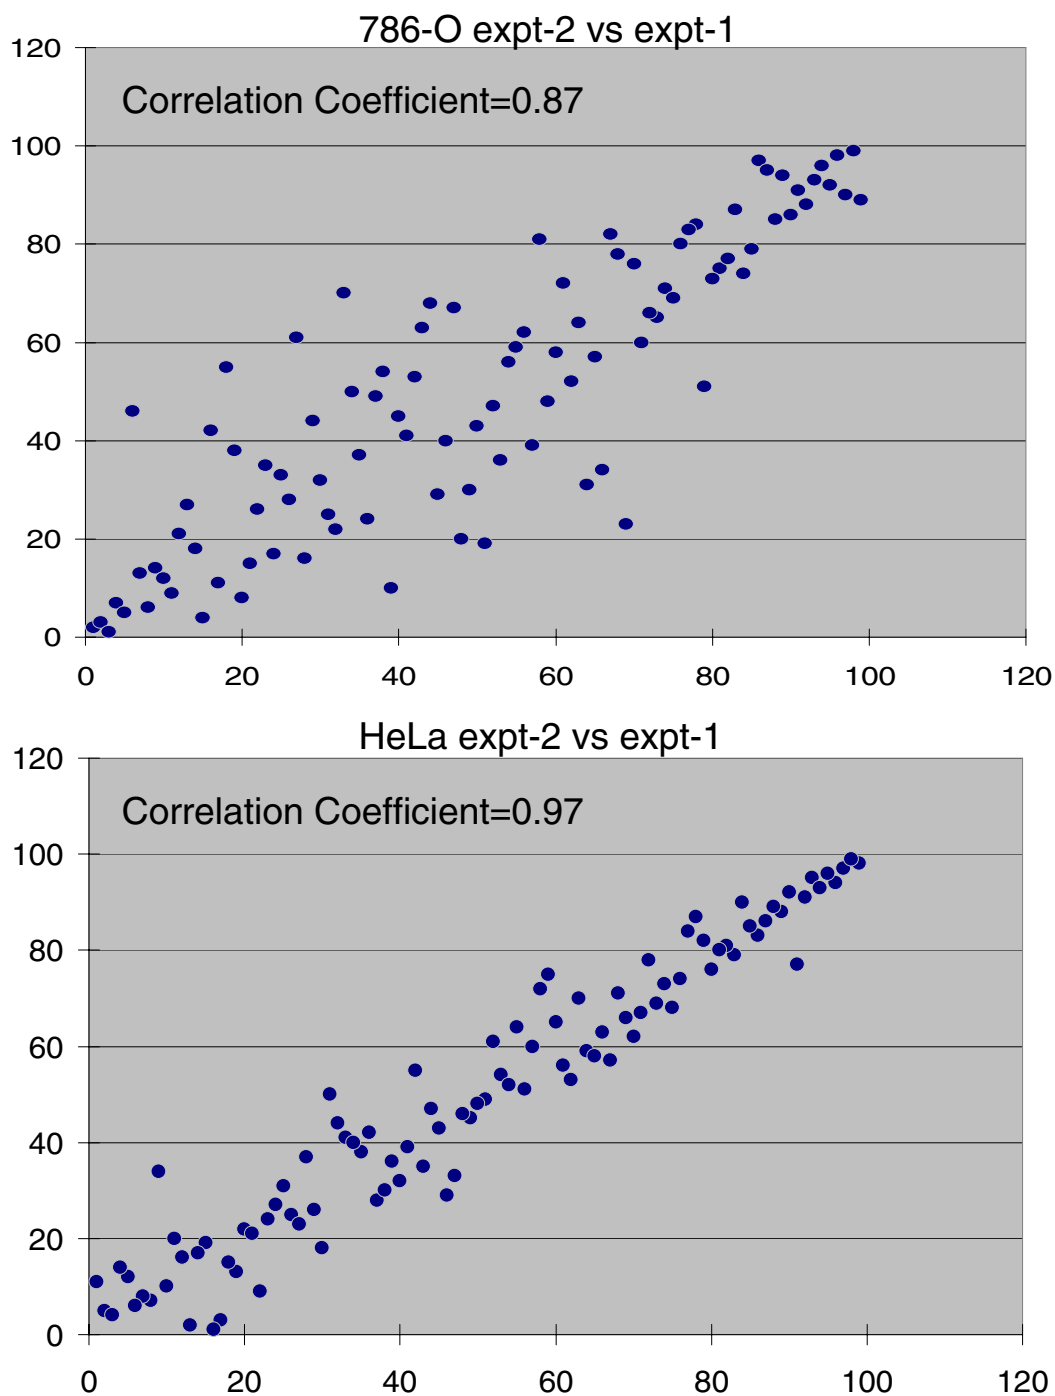

**Fig. S1.** Reproducibility of proliferation and viability screen. Rank order values were derived from percent reduction in proliferation and viability after normalization for HeLa and 786-O cells, which followed the transduction of 100 lentiviral shRNA expression vectors targeting 80 unique kinases plus controls. Data were plotted from two independent 786-O experiments are compared on the x- and y axis with a correlation coefficient of 0.87, and two independent HeLa experiments with a correlation coefficient of 0.97, demonstrating reproducibility between replicate screens.

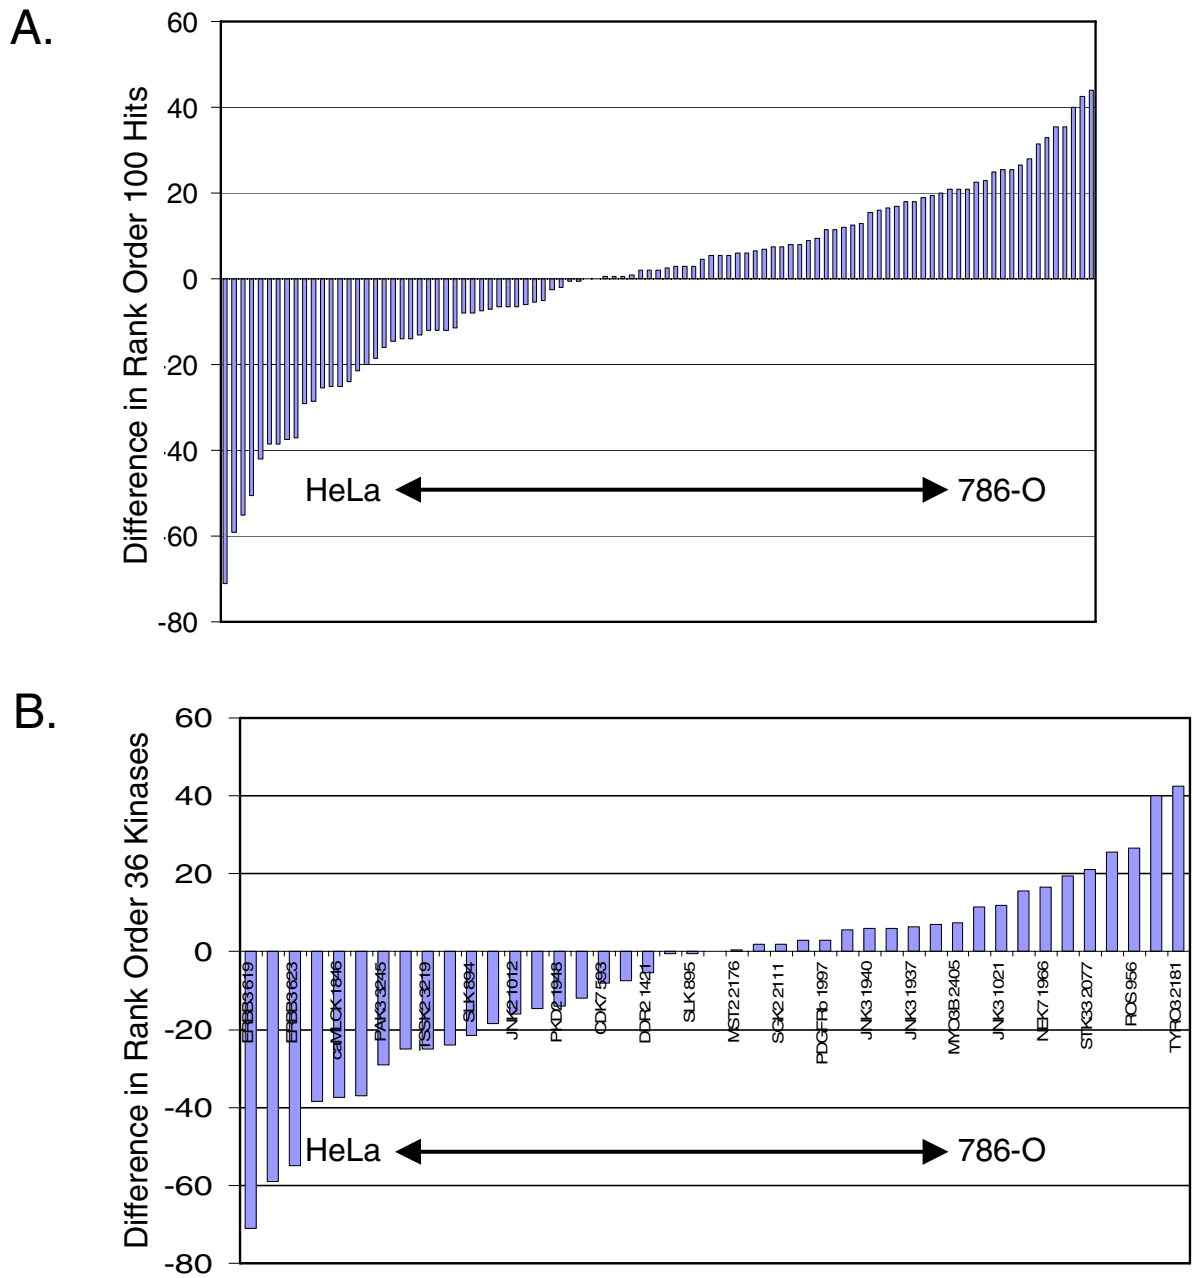

**Fig. S2.** Differential kinase requirements in HeLa and 786-O cells. Difference in rank order was derived from percent reduction in proliferation and viability after normalization for HeLa cells and 786-O cells transduced with (A) 100 lentivirus shRNA expression vectors targeting 80 unique kinases plus controls or (B) with the subset containing 173 lentivirus shRNA expression vectors targeting 36 kinases.

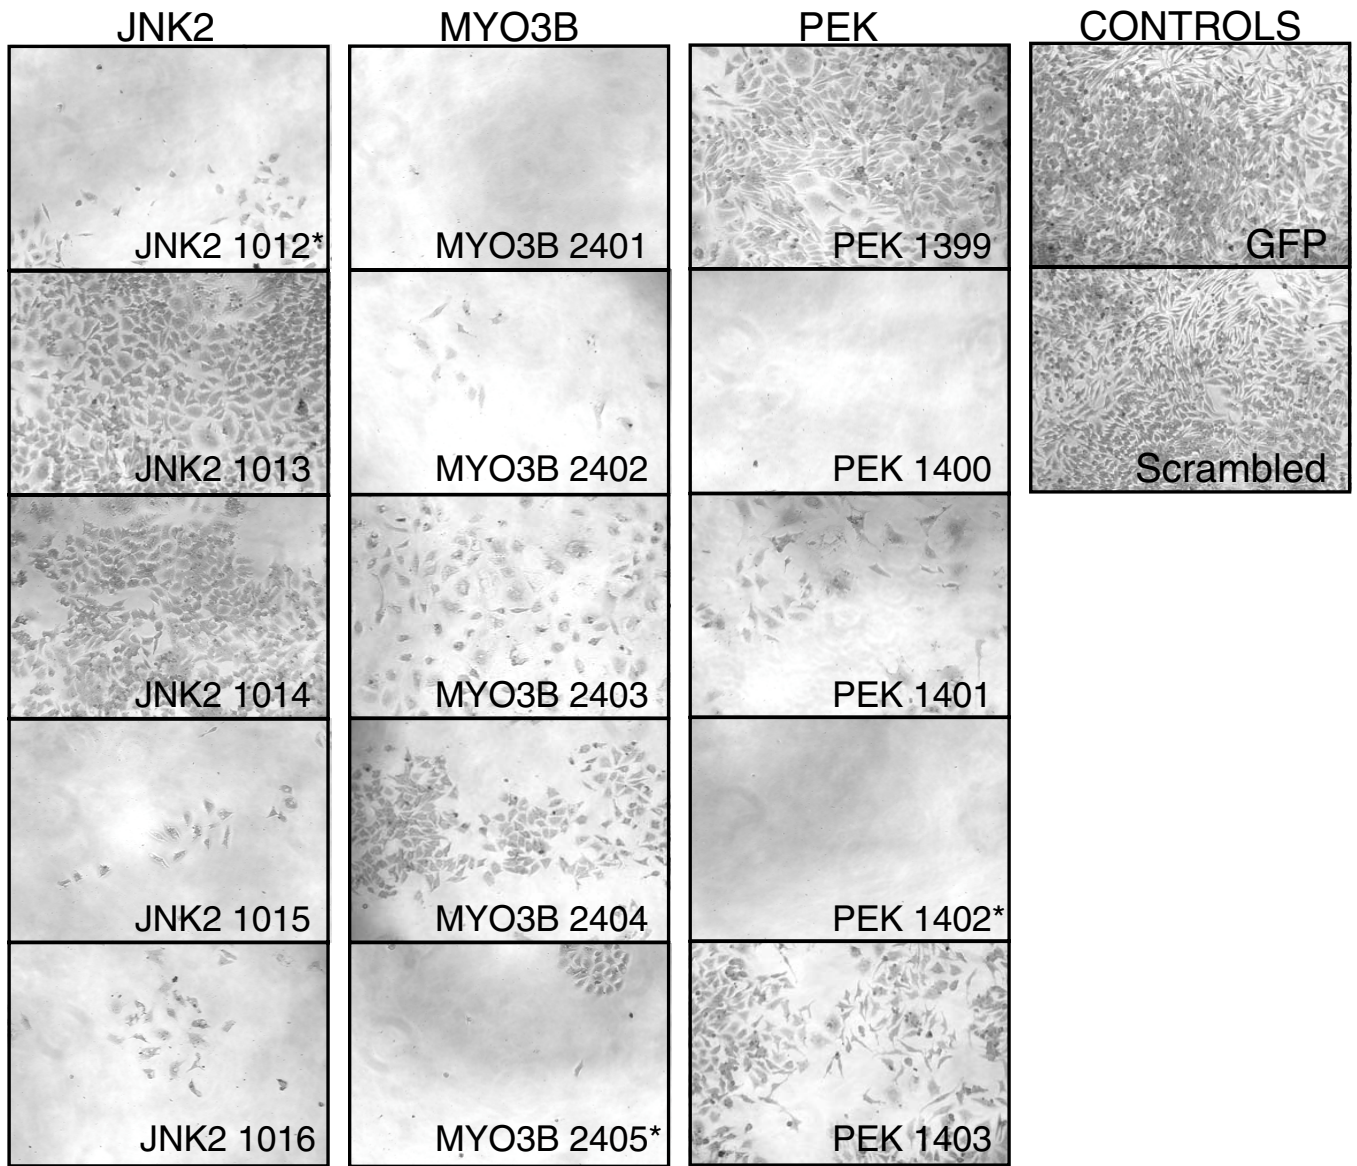

**Fig. S3.** Viral transduction of additional shRNAs targeting the same kinase. Photomicrographs of crystal violet stained HeLa cells 6 days after viral transduction of 5 hairpins each for *JNK2*, *MYO3B*, and *PEK* genes demonstrating decreased numbers of cells when infected with hairpins that scored as effective killers. The control infections include a GFP-containing lentiviral vector and a scrambled hairpin in the lentiviral vector that do not inhibit cell growth.

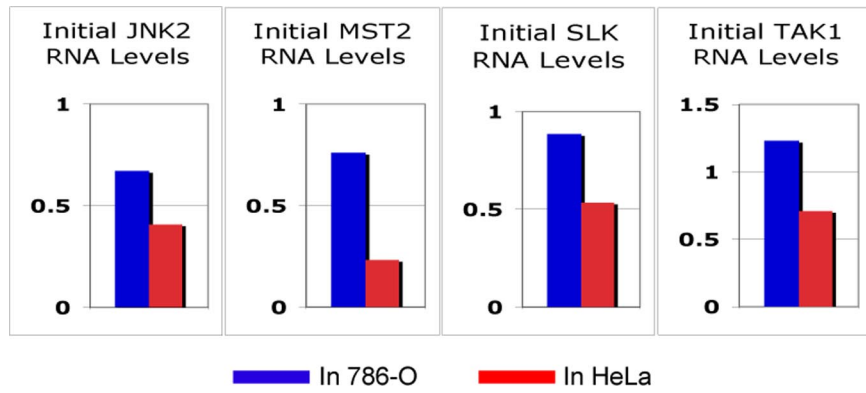

**Fig. S4.** Target mRNA levels in HeLa and 786-O cells. Panomics QuantiGene assays were used to quantify starting mRNA levels in HeLa and 786-O cells. JNK2, MST2, SLK, and TAK1 mRNA levels were measured and normalized to GAPDH.

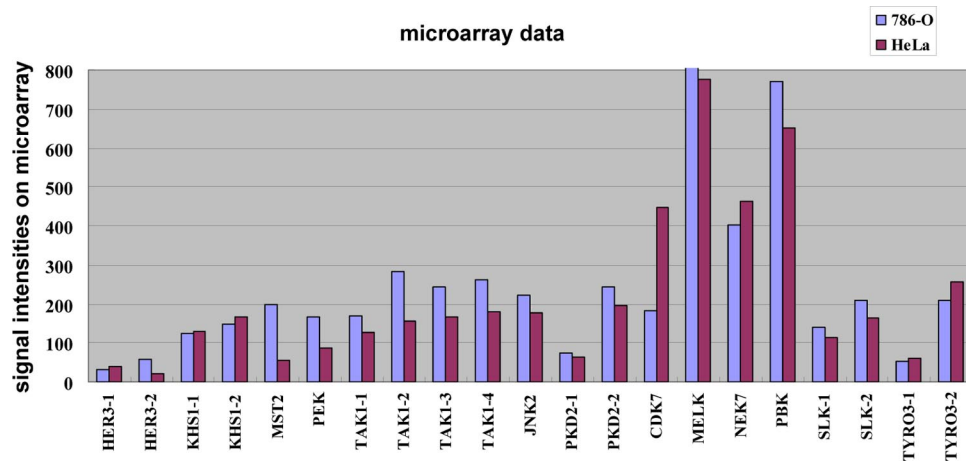

**Fig. S5.** RNA expression levels for kinases are similar between HeLa and 786-O cells. Microarray data showing gene expression patterns for 13 kinases in 786-O cells (in blue) and HeLa cells (in red) (<http://wombat.gnf.org/index.html>). For the majority of kinases, the RNA expression levels are slightly higher in 786-O cells levels, and for many, closely follow patterns shown for HeLa cells.





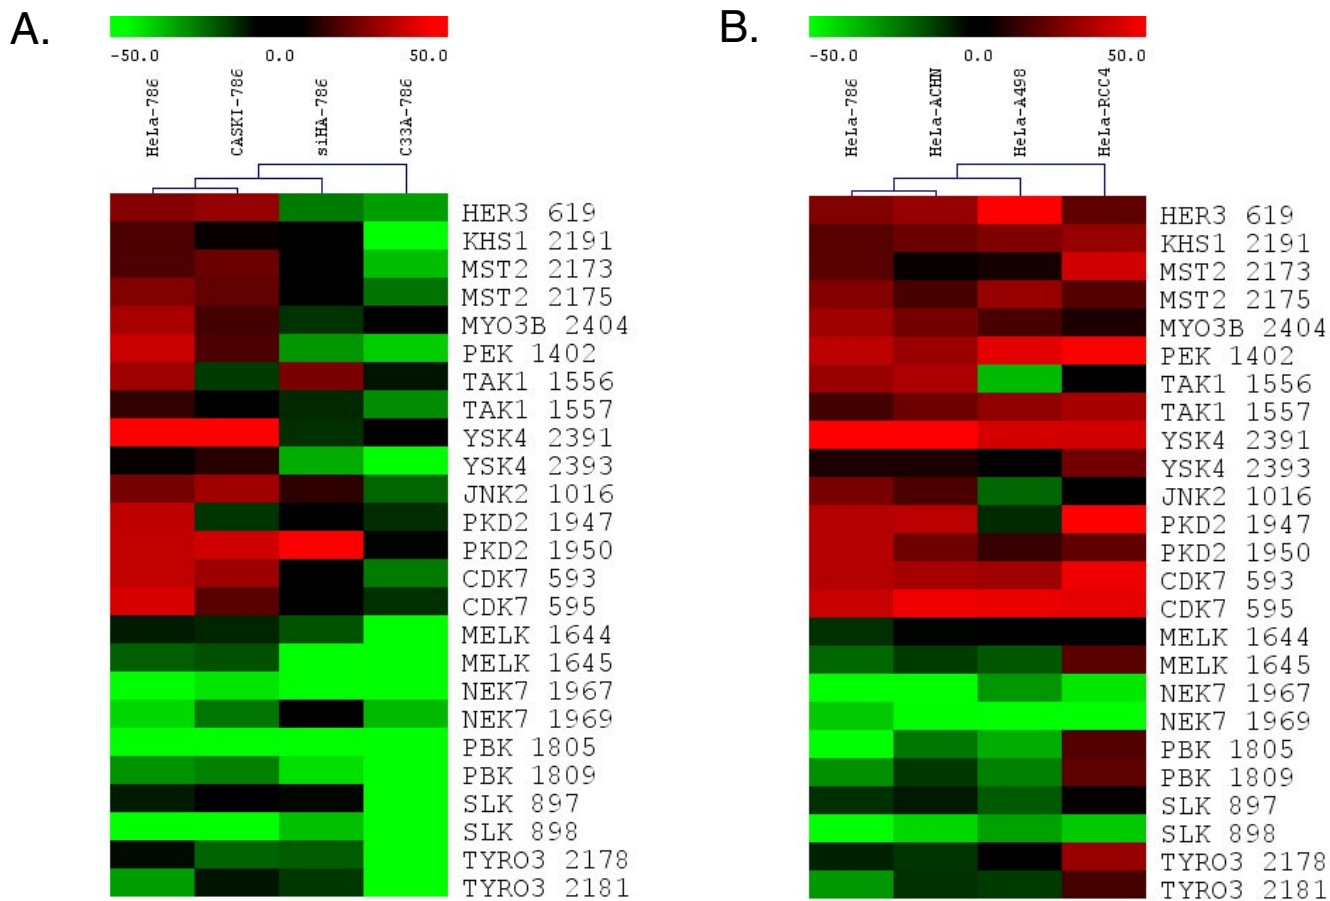

**Fig. S8.** Similar kinase requirements shown in additional cervical and renal cell lines. Four cervical cancer cell lines, including HeLa, CaSKI, SiHa, and C33A; and four renal cancer cell lines, including 786-O, ACHN, A498, and RCC4 were transduced with 25 shRNA-expressing viruses targeting 15 genes previously identified as preferential killers in HeLa (group 1 shRNAs) or 786-O (group 2 shRNAs) cells. Cells were grown in the presence of puromycin. Alamar Blue measurements were taken 6 days after transduction, and difference in percent reduction in viability was calculated after normalization (with a scrambled shRNA as nonkilling control) between pairs of cervical and renal cell lines. Color scale ranges represent changes in viability between four cervical cancer cell lines and 786-O (Panel A), or between HeLa and four renal cancer cell lines (Panel B). Red corresponds to more growth inhibition for cervical cell lines. Green corresponds to more growth inhibition for renal cell lines. Columns display different cell lines tested. Rows display shRNAs from groups 1 and 2. Data were clustered by an Euclidean distance algorithm.



Table S1. Results of replicate essential kinase screens performed in 786-O and HeLa cells

| Gene TRCN    | 786-O expt-1 | 786-O expt-2 | HeLa expt-1 | HeLa expt-2 |
|--------------|--------------|--------------|-------------|-------------|
| AAK1 1945    | 42           | 53           | 67          | 57          |
| ADCK4 7332   | 64           | 31           | 40          | 32          |
| ALK 788      | 23           | 35           | 70          | 62          |
| ALK4 1810    | 12           | 21           | 11          | 20          |
| AMPKa1 859   | 15           | 4            | 19          | 13          |
| BRD2 6312    | 89           | 94           | 63          | 70          |
| BTK 360      | 9            | 14           | 23          | 24          |
| BUBR1 462    | 29           | 44           | 2           | 5           |
| CaMK1G 1452  | 61           | 72           | 44          | 47          |
| CAMK2A 10286 | 79           | 51           | 49          | 45          |
| CamK4 580    | 73           | 65           | 51          | 49          |
| CAMKK1 1982  | 24           | 17           | 50          | 48          |
| caMLCK 1846  | 37           | 49           | 79          | 82          |
| CDK10 1821   | 30           | 32           | 25          | 31          |
| CDK10 1822   | 52           | 47           | 31          | 50          |
| CDK11 3141   | 86           | 97           | 89          | 88          |
| CDK3 482     | 38           | 54           | 86          | 83          |
| CDK4 365     | 60           | 58           | 53          | 54          |
| CDK6 487     | 32           | 22           | 1           | 11          |
| CDK7 593     | 74           | 71           | 77          | 84          |
| CDK9 495     | 11           | 9            | 8           | 7           |
| CDK9 498     | 4            | 7            | 7           | 8           |
| CK1e 1834    | 6            | 46           | 24          | 27          |
| CK1e 1835    | 8            | 6            | 12          | 16          |
| CK1e 603     | 85           | 79           | 93          | 95          |
| CK2a2 611    | 46           | 40           | 46          | 29          |
| CLIK1L 2296  | 26           | 28           | 71          | 67          |
| CLK3 745     | 47           | 67           | 52          | 61          |
| DDR2 1421    | 93           | 93           | 99          | 98          |
| EEF2K 6222   | 10           | 12           | 64          | 59          |
| EPHB1 821    | 55           | 59           | 83          | 79          |
| EPHB4 1775   | 70           | 76           | 73          | 69          |
| FER 2347     | 59           | 48           | 26          | 25          |
| FGFR3 373    | 72           | 66           | 27          | 23          |
| FYN 3098     | 83           | 87           | 85          | 85          |
| GFP          | 1            | 2            | 13          | 2           |
| HER3 619     | 22           | 26           | 96          | 94          |
| HER3 623     | 25           | 33           | 91          | 77          |
| HER4 1410    | 5            | 5            | 10          | 10          |
| HIPK2 3201   | 34           | 50           | 37          | 28          |
| HUNK 2271    | 54           | 56           | 48          | 46          |
| IRR 3189     | 62           | 52           | 9           | 34          |
| JNK2 1012    | 56           | 62           | 72          | 78          |
| JNK3 1018    | 2            | 3            | 17          | 3           |
| JNK3 1021    | 21           | 15           | 6           | 6           |
| JNK3 1937    | 90           | 86           | 82          | 81          |
| JNK3 1940    | 96           | 98           | 90          | 92          |
| KHS1 2187    | 81           | 75           | 60          | 65          |
| LATS2 883    | 35           | 37           | 35          | 38          |
| LKB1 409     | 27           | 61           | 20          | 22          |
| MAP2K1 2328  | 36           | 24           | 28          | 37          |
| MAPAPK3 6155 | 31           | 25           | 22          | 9           |
| MELK 1644    | 98           | 99           | 84          | 90          |
| MET 396      | 20           | 8            | 5           | 12          |
| MISR2 1957   | 67           | 82           | 36          | 42          |
| MST2 2176    | 99           | 89           | 94          | 93          |
| MYO3B 2405   | 92           | 88           | 78          | 87          |
| MYT1 6236    | 78           | 84           | 58          | 72          |
| NEK7 1966    | 58           | 81           | 54          | 52          |
| NLK 2068     | 95           | 92           | 87          | 86          |
| PACGFP       | 3            | 1            | 16          | 1           |
| PAK3 3244    | 80           | 73           | 88          | 89          |
| PAK3 3245    | 40           | 45           | 75          | 68          |
| PBK 1809     | 68           | 78           | 56          | 51          |



**Table S2. Select list of essential kinases.**

|        |        |       |
|--------|--------|-------|
| AAK1   | JNK2   | PEK   |
| ALK    | JNK3   | PKD2  |
| caMLCK | KHS1   | PKN1  |
| CDK3   | LATS2  | ROS1  |
| CDK4   | MELK   | SGK2  |
| CDK7   | MST2   | SLK   |
| CDK11  | MYO3B  | STK33 |
| DDR2   | NEK7   | TAK   |
| EPHB1  | NLK    | TSSK2 |
| EPHB4  | PAK3   | TYRO3 |
| ERBB3  | PBK    | ULK4  |
| FYN    | PDGFRB | YSK4  |

Initially one hundred hairpins targeting 80 unique kinases plus controls were scored as "hits" by inhibiting growth by 50% or more in HeLa or 293T cells as compared with the median proliferation value of all shRNAs. Listed are the names of 36 out of 80 kinases used to transduce HeLa and 786-O cells.
